# Supplementary material
Source: MDPI journal article supplement (https://www.mdpi.com/2076-0760/12/12/649)
Supplement: s1 [file s1 › socsci-2641068-supplementary.pdf]

## Supplementary Materials

### **Contents**

|                                                                                                                                                                                                 |    |
|-------------------------------------------------------------------------------------------------------------------------------------------------------------------------------------------------|----|
| <b>Section S1.</b> Questionnaire wording in UKHLS and CSEW. ....                                                                                                                                | 2  |
| <b>Table S1.</b> Questionnaire wording for overlapping Indicators of Fear of Violence and Violence<br>Exposure in the UKHLS and the CSEW .....                                                  | 2  |
| <b>Section S2.</b> Questionnaire wording and sequencing in UKHLS .....                                                                                                                          | 4  |
| 1. Full questionnaire sequence for variable measuring ‘unsafe’ .....                                                                                                                            | 4  |
| 2. Full questionnaire sequence for variable measuring ‘avoided’ .....                                                                                                                           | 5  |
| 3. Full questionnaire sequence for variable measuring ‘threatened/insulted’ .....                                                                                                               | 6  |
| 4. Full questionnaire sequence for variable measuring ‘attacked’ .....                                                                                                                          | 7  |
| 5. Full questionnaire sequence for variable measuring ‘fear of crime’ .....                                                                                                                     | 8  |
| <b>Section S3.</b> Overlap between screener questions and offence codes in the CSEW. ....                                                                                                       | 9  |
| <b>Table S2.</b> Physical violence and threat offences and via which screener question respondents<br>entered the victim form. ....                                                             | 9  |
| <b>Table S3.</b> Respondents who said yes to the physical violence and threat screener question and as<br>what type of offence it was coded by professional coders. ....                        | 9  |
| <b>Section S4.</b> Comparing predictors of violence and feeling unsafe in UKHLS and CSEW. ....                                                                                                  | 10 |
| <b>Table S4.</b> Comparing predictors of attacked/violent offence, threatened/insulted, and feeling unsafe<br>for the UKHLS and CSEW datasets. Odds ratios presented and SE in parentheses..... | 10 |

## Section S1. Questionnaire wording in UKHLS and CSEW.

**Table S1.** Questionnaire wording for overlapping Indicators of Fear of Violence and Violence Exposure in the UKHLS and the CSEW

|                                                            | <b>UKHLS</b>                                                                                                                                                | <b>CSEW</b>                                                                                                                                                                                                                                                                                                                                                                                                                                                                                                                                                                                                                                                                                         |
|------------------------------------------------------------|-------------------------------------------------------------------------------------------------------------------------------------------------------------|-----------------------------------------------------------------------------------------------------------------------------------------------------------------------------------------------------------------------------------------------------------------------------------------------------------------------------------------------------------------------------------------------------------------------------------------------------------------------------------------------------------------------------------------------------------------------------------------------------------------------------------------------------------------------------------------------------|
| Fear of violence, feeling 'unsafe' (0-1)                   | In the last 12 months, have you <i>felt unsafe</i> in any of these places? If so, which ones?                                                               | How safe do you feel walking alone in this area after dark? By this area I mean within 15 minutes walk from here. 1. Very safe 2. Fairly safe 3. A bit unsafe 4. or very unsafe?                                                                                                                                                                                                                                                                                                                                                                                                                                                                                                                    |
| Fear of violence, avoiding specific areas/locations. (0-1) | In the last 12 months, have you <i>avoided going to or being in any of the places listed</i> on the card? If so, which ones?                                | No equivalent question                                                                                                                                                                                                                                                                                                                                                                                                                                                                                                                                                                                                                                                                              |
| Violence exposure, was Insulted/threatened (0-1)           | In the last 12 months, have you been <i>insulted, called names, threatened or shouted at</i> , in any of the places listed on this card? If so, which ones? | Version 1: (offence coding) <i>After answering screener questions regarding victimisation, respondents are asked to provide a detailed account of each incident. Trained coders subsequently assess whether what has been reported represents a crime and, if so, which one. Categories included under threatened are: Threat to kill/assault made against, but not necessarily to respondent; Sexual threat made against, but not necessarily to respondent; Other threat or intimidation made against, but not necessarily to respondent; Threats against others, made to the respondent</i><br><br>Version 2: (screener question) "And [apart from anything you have already mentioned], in that |

|                                       |                                                                                                                             |                                                                                                                                                                                                                                                                                                                                                                                                                                                                                                                                                                                                                                                                                                                                                                                                                 |
|---------------------------------------|-----------------------------------------------------------------------------------------------------------------------------|-----------------------------------------------------------------------------------------------------------------------------------------------------------------------------------------------------------------------------------------------------------------------------------------------------------------------------------------------------------------------------------------------------------------------------------------------------------------------------------------------------------------------------------------------------------------------------------------------------------------------------------------------------------------------------------------------------------------------------------------------------------------------------------------------------------------|
|                                       |                                                                                                                             | <p>time, has anyone THREATENED you in any way that actually frightened you?</p> <p>Please include threats that have been made by any means, for example in person, on-line or over the telephone.</p>                                                                                                                                                                                                                                                                                                                                                                                                                                                                                                                                                                                                           |
| Violence exposure, was attacked (0-1) | In the last 12 months, have you been <i>physically attacked</i> in any of the places listed on the card? If so, which ones? | <p>Version 1: (offence coding) <i>After answering screener questions regarding victimisation, respondents are asked to provide a detailed account of each incident. Trained coders subsequently assess whether what has been reported represents a crime and, if so, which one. Categories included under attacked are: Serious wounding; Other wounding; Common assault; Attempted assault; Serious wounding with sexual motive; Other wounding with sexual motive; Robbery; Attempted robbery</i></p> <p>Version 2: (screener question) And again, [apart from anything you have already mentioned], since the first of [^DATE^] has anyone, including people you know well, DELIBERATELY hit you with their fists or with a weapon of any sort or kicked you or used force or violence in any other way?</p> |

## **Section S2. Questionnaire wording and sequencing in UKHLS**

**Full questionnaire wording and sequence** from wave 11 of the UKHLS adult mainstage survey, for the module on Harassment.

### **1. Full questionnaire sequence for variable measuring ‘unsafe’.**

Interviewer: ‘The next few questions are about how safe you feel in different places. In the last 12 months, have you felt unsafe in any of these places? If so, which ones?’

A showcard is then presented to the respondent with the following options to choose from:

- 1 At school
- 2 At college or university
- 3 At work
- 4 On public transport
- 5 At or around a bus or train station
- 6 In commercial places like shopping centres, shops or petrol stations
- 7 In places of entertainment like theatres, cinema, cafes or restaurants
- 8 At pubs, nightclubs, discos or clubs
- 9 In car parks
- 10 Outside, such as on the street, in parks or sports grounds
- 11 At home
- 96 SPONTANEOUS No, this has not happened to me in the last 12 months

Interviewer: Did you feel unsafe for any of these reasons? If so, which ones?

A showcard is then presented to the respondent with the following options to choose from:

- 1 Your sex
- 2 Your age
- 3 Your ethnicity
- 4 Your sexual orientation
- 5 Your health or disability
- 6 Your nationality
- 7 Your religion
- 8 Your language or accent
- 9 Your dress or appearance
- 96 one of the above (SPONTANEOUS)
- 97 other reason

## 2. Full questionnaire sequence for variable measuring 'avoided'.

Interviewer: 'In the last 12 months, have you avoided going to or being in any of these places? If so, which ones?'

A showcard is then presented to the respondent with the following options to choose from:

- 1 At school
- 2 At college or university
- 3 At work
- 4 On public transport
- 5 At or around a bus or train station
- 6 In commercial places like shopping centres, shops or petrol stations
- 7 In places of entertainment like theatres, cinema, cafes or restaurants
- 8 At pubs, nightclubs, discos or clubs
- 9 In car parks
- 10 Outside, such as on the street, in parks or sports grounds
- 11 At home
- 96 SPONTANEOUS No, this has not happened to me in the last 12 months

Interviewer: Did you avoid for any of these reasons? If so, which ones?

A showcard is then presented to the respondent with the following options to choose from:

- 1 Your sex
- 2 Your age
- 3 Your ethnicity
- 4 Your sexual orientation
- 5 Your health or disability
- 6 Your nationality
- 7 Your religion
- 8 Your language or accent
- 9 Your dress or appearance

**3. Full questionnaire sequence for variable measuring ‘threatened/insulted’.**

Interviewer: ‘In the last 12 months, have you been insulted, called names, threatened or shouted at, in any of these places? If so, which ones?’

A showcard is then presented to the respondent with the following options to choose from:

- 1 At school
- 2 At college or university
- 3 At work
- 4 On public transport
- 5 At or around a bus or train station
- 6 In commercial places like shopping centres, shops or petrol stations
- 7 In places of entertainment like theatres, cinema, cafes or restaurants
- 8 At pubs, nightclubs, discos or clubs
- 9 In car parks
- 10 Outside, such as on the street, in parks or sports grounds
- 11 At home
- 96 SPONTANEOUS No, this has not happened to me in the last 12 months

Interviewer: Were you insulted, called names, threatened or shouted at [INSULTED] for any of these reasons? If so, which ones?

A showcard is then presented to the respondent with the following options to choose from:

- 1 Your sex
- 2 Your age
- 3 Your ethnicity
- 4 Your sexual orientation
- 5 Your health or disability
- 6 Your nationality
- 7 Your religion
- 8 Your language or accent
- 9 Your dress or appearance

4. Full questionnaire sequence for variable measuring 'attacked'.

Interviewer: 'In the last 12 months, have you been physically attacked in any of these places?'

A showcard is then presented to the respondent with the following options to choose from:

- 1 At school
- 2 At college or university
- 3 At work
- 4 On public transport
- 5 At or around a bus or train station
- 6 In commercial places like shopping centres, shops or petrol stations
- 7 In places of entertainment like theatres, cinema, cafes or restaurants
- 8 At pubs, nightclubs, discos or clubs
- 9 In car parks
- 10 Outside, such as on the street, in parks or sports grounds
- 11 At home
- 96 SPONTANEOUS No, this has not happened to me in the last 12 months

Interviewer: Were you physically attacked [ATTACKED] for any of these reasons? If so, which ones?

A showcard is then presented to the respondent with the following options to choose from:

- 1 Your sex
- 2 Your age
- 3 Your ethnicity
- 4 Your sexual orientation
- 5 Your health or disability
- 6 Your nationality
- 7 Your religion
- 8 Your language or accent
- 9 Your dress or appearance

**5. Full questionnaire sequence for variable measuring 'fear of crime'.**

Interviewer:

Now we have some questions about crime. Do you ever worry about the possibility that you, or anyone else who lives with you, might be the victim of crime? [Y/N]

[if Yes]

Interviewer: 'Is this a big worry, a bit of a worry, or an occasional doubt?' [1,2,3]

Interviewer: 'How safe do you feel walking alone in this area after dark?'

1 Very safe

2 Fairly safe

3 A bit unsafe

4 Very unsafe?

5 SPONTANEOUS: Never go out after dark

### Section S3. Overlap between screener questions and offence codes in the CSEW.

**Table S2.** Physical violence and threat offences and via which screener question respondents entered the victim form.

|                                          |                                                | Coded as physical<br>violence offence<br>% | Coded as threat<br>offence<br>% |
|------------------------------------------|------------------------------------------------|--------------------------------------------|---------------------------------|
|                                          |                                                |                                            |                                 |
| <i>Entered via<br/>Screener question</i> | Motor theft (multiple questions)               | 0.5                                        | 0.1                             |
|                                          | Burglary and robbery (multiple questions)      | 0.5                                        | 0.4                             |
|                                          | Theft and criminal damage (multiple questions) | 7.9                                        | 0.9                             |
|                                          | Physical violence                              | 60.9                                       | 1.0                             |
|                                          | Threatened                                     | 25.3                                       | 97.2                            |
|                                          | Sexual assaulted/attacked                      | 0.7                                        | 0.2                             |
|                                          | Physical attack by someone in household        | 4.3                                        | 0.1                             |
|                                          | Total                                          | 100                                        | 100                             |

Source: Crime Survey of England and Wales 2019-2020.

**Table S3.** Respondents who said yes to the physical violence and threat screener question and as what type of offence it was coded by professional coders.

|                                           |                                 | Yes on Physical violence<br>screener question<br>% | Yes on Threats<br>screener question<br>% |
|-------------------------------------------|---------------------------------|----------------------------------------------------|------------------------------------------|
|                                           |                                 |                                                    |                                          |
| <i>Coded as<br/>offence<br/>category:</i> | Physical violence/abuse offence | 78.8                                               | 12.8                                     |
|                                           | Sexual violence/abuse offence   | 1.1                                                | 0.5                                      |
|                                           | Threat offence                  | 1.9                                                | 72.7                                     |
|                                           | Economic offence                | 7.6                                                | 7.0                                      |
|                                           | Outside survey scope or missing | 10.6                                               | 7.1                                      |
|                                           | Total                           | 100                                                | 100                                      |

Source: Crime Survey of England and Wales 2019-2020.

## Section S4. Comparing predictors of violence and feeling unsafe in UKHLS and CSEW.

**Table S4.** Comparing predictors of attacked/violent offence, threatened/insulted, and feeling unsafe for the UKHLS and CSEW datasets. Odds ratios presented and SE in parentheses.

|                                                    | Unsafe                  |                         | Threatened              |                         | Attacked                |                         |
|----------------------------------------------------|-------------------------|-------------------------|-------------------------|-------------------------|-------------------------|-------------------------|
|                                                    | UKHLS                   | CSEW                    | UKHLS                   | CSEW                    | UKHLS                   | CSEW                    |
|                                                    | OR (SE)                 |
| <i>Gender (Ref=Female)</i>                         |                         |                         |                         |                         |                         |                         |
| Male                                               | 0.522**<br>*<br>(0.021) | 0.343**<br>*<br>(0.027) | 0.905*<br>(0.045)       | 0.826*<br>(0.073)       | 1.126<br>(0.136)        | 1.620**<br>*<br>(0.176) |
| <i>Age (Ref=16-24)</i>                             |                         |                         |                         |                         |                         |                         |
| 25-34                                              | 0.757**<br>(0.068)      | 0.842<br>(0.160)        | 0.831<br>(0.088)        | 0.801<br>(0.155)        | 0.592**<br>(0.120)      | 0.572**<br>(0.107)      |
| 35-44                                              | 0.662**<br>*<br>(0.063) | 0.823<br>(0.159)        | 0.728**<br>(0.082)      | 0.778<br>(0.154)        | 0.522**<br>(0.127)      | 0.421**<br>*<br>(0.085) |
| 45-54                                              | 0.511**<br>*<br>(0.046) | 0.801<br>(0.152)        | 0.638**<br>*<br>(0.068) | 0.888<br>(0.172)        | 0.473**<br>(0.110)      | 0.365**<br>*<br>(0.074) |
| 55+                                                | 0.332**<br>*<br>(0.031) | 0.894<br>(0.172)        | 0.402**<br>*<br>(0.046) | 0.638*<br>(0.132)       | 0.279**<br>*<br>(0.083) | 0.208**<br>*<br>(0.052) |
| <i>Ethnicity (Ref=White)</i>                       |                         |                         |                         |                         |                         |                         |
| Asian                                              | 0.769**<br>*<br>(0.056) | 1.891**<br>*<br>(0.273) | 0.784*<br>(0.075)       | 1.161<br>(0.202)        | 1.181<br>(0.241)        | 0.488**<br>(0.118)      |
| Black                                              | 1.114<br>(0.124)        | 1.008<br>(0.243)        | 0.974<br>(0.131)        | 0.828<br>(0.236)        | 0.996<br>(0.279)        | 0.445*<br>(0.157)       |
| Mixed                                              | 1.100<br>(0.151)        | 1.160<br>(0.390)        | 1.178<br>(0.181)        | 1.222<br>(0.425)        | 1.617<br>(0.446)        | 0.884<br>(0.351)        |
| Other                                              | 1.241<br>(0.295)        | 0.994<br>(0.409)        | 0.766<br>(0.262)        | 1.178<br>(0.438)        | 0.625<br>(0.434)        | 0.520<br>(0.271)        |
| <i>Relationship status (Ref=Married or cohab.)</i> |                         |                         |                         |                         |                         |                         |
| Single or widowed                                  | 1.022<br>(0.057)        | 0.983<br>(0.095)        | 1.148<br>(0.084)        | 1.036<br>(0.114)        | 1.185<br>(0.206)        | 1.364*<br>(0.192)       |
| Separated or Divorced                              | 1.228**<br>(0.089)      | 1.083<br>(0.128)        | 1.371**<br>*<br>(0.126) | 1.850**<br>*<br>(0.235) | 1.331<br>(0.275)        | 2.373**<br>*<br>(0.406) |
| <i>Employment status (Ref=Employed)</i>            |                         |                         |                         |                         |                         |                         |
| Unemployed                                         | 0.712**<br>(0.079)      | 0.865<br>(0.279)        | 0.667**<br>(0.094)      | 1.309<br>(0.354)        | 0.649<br>(0.181)        | 0.796<br>(0.271)        |
| Outside LF                                         | 0.743**<br>*<br>(0.042) | 1.103<br>(0.104)        | 0.471**<br>*<br>(0.038) | 0.734*<br>(0.101)       | 0.495**<br>*<br>(0.102) | 0.675<br>(0.143)        |
| Student                                            | 1.202<br>(0.118)        | 0.477<br>(0.198)        | 1.074<br>(0.118)        | 0.833<br>(0.303)        | 0.682<br>(0.164)        | 0.675<br>(0.224)        |
| <i>Household income (Ref=52k or more)</i>          |                         |                         |                         |                         |                         |                         |
| Up to 10,4k                                        | 0.856<br>(0.088)        | 1.721**<br>*<br>(0.280) | 0.877<br>(0.120)        | 0.660*<br>(0.125)       | 1.079<br>(0.363)        | 0.832<br>(0.178)        |
| 10,4k - 20,8k                                      | 0.800**<br>(0.057)      | 1.562**<br>*<br>(0.204) | 0.829<br>(0.081)        | 0.625**<br>(0.095)      | 1.010<br>(0.236)        | 0.715<br>(0.129)        |

|                              |                   |                    |                    |                   |                  |                    |
|------------------------------|-------------------|--------------------|--------------------|-------------------|------------------|--------------------|
| 20,8k - 31,2k                | 0.805**<br>*      | 1.751**<br>*       | 0.911<br>(0.074)   | 0.768*<br>(0.103) | 1.230<br>(0.219) | 0.782<br>(0.145)   |
| 31,2k - 41,6k                | 0.869*<br>(0.052) | 1.262<br>(0.174)   | 1.007<br>(0.076)   | 0.609**<br>*      | 1.264<br>(0.217) | 1.038<br>(0.179)   |
| 41,6k - 52k                  | 1.012<br>(0.062)  | 1.278<br>(0.173)   | 0.932<br>(0.075)   | 0.792<br>(0.118)  | 0.890<br>(0.168) | 0.960<br>(0.176)   |
| Housing tenure (Ref=Owner)   |                   |                    |                    |                   |                  |                    |
| Renter                       | 1.178**<br>*      | 1.151<br>(0.102)   | 1.400**<br>*       | 1.174<br>(0.109)  | 1.658**<br>*     | 1.473**<br>(0.181) |
| Other                        | 1.592*<br>(0.375) | 1.155<br>(0.336)   | 1.239<br>(0.409)   | 0.888<br>(0.276)  | 0.871<br>(0.658) | 1.243<br>(0.358)   |
| Disability (Ref=No)          |                   |                    |                    |                   |                  |                    |
| Yes                          | 1.651**<br>*      | 1.783**<br>*       | 1.471**<br>*       | 2.050**<br>*      | 1.801**<br>*     | 2.313**<br>*       |
| Benefits (Ref=No)            |                   |                    |                    |                   |                  |                    |
| Yes                          | 1.508**<br>*      | 1.315**<br>(0.129) | 1.420**<br>(0.154) | 1.182<br>(0.139)  | 2.200**<br>*     | 1.103<br>(0.152)   |
| Nr. of dependents (Ref=None) |                   |                    |                    |                   |                  |                    |
| One                          | 0.856*<br>(0.061) | 0.959<br>(0.129)   | 0.867<br>(0.076)   | 0.945<br>(0.138)  | 0.853<br>(0.188) | 1.241<br>(0.216)   |
| Two or more                  | 0.737**<br>*      | 0.870<br>(0.117)   | 0.854<br>(0.076)   | 0.874<br>(0.125)  | 1.104<br>(0.210) | 0.891<br>(0.167)   |
| Constant                     | 0.932<br>(0.080)  | 0.275**<br>*       | 0.269**<br>*       | 0.041**<br>*      | 0.030**<br>*     | 0.029**<br>*       |
| N                            | 23,883            | 6,490              | 23,883             | 27,922            | 23,883           | 27,922             |

Source: UKHLS and CSEW. \*\*\* p<0.001, \*\* p<0.01, \* p<0.05.
